# Supplementary material
Source: PubMed Central journal article supplement (PMC3409242)
Supplement: pone.0038704.s001.pdf [file pone.0038704.s001.pdf]

# Supplementary Information

Greg Morrison and L. Mahadevan

June 5, 2012

## 1 Closeness Measures and Community Detection

A schematic diagram of a network with easily-detected community structure is shown in Fig. S1(a). In this network, a pair of communities with  $|c| = N/2$  nodes each is connected by exactly one edge (between  $\alpha$  and  $\beta$ ). For any reasonable measure of closeness, a node will feel closer to other nodes within its community rather than those in a different community, with the Generalized Erdős numbers (GENs), Jacard Coefficients (JCs), and overlap explicitly demonstrated as having this property. Resistance Distance, the mean first passage time between nodes, and the Adar / Adamic coefficient[1] all behave in a similar manner (not shown). There is a clear separation between in-community and out-of-community closenesses for the network in Fig. S1(a), which can be used to determine the correct community structure. Each node  $i$  is constrained to be in the same community as their closest friend,  $f(i)$ . This is similar in spirit to the resistance-distance approach of Wu and Huberman[2], but does not require an arbitrary threshold for defining communities. Each measure of closeness will behave differently when fuzzy communities are detected, with some outperforming others in the ability to detect communities (as discussed in the main text). We note that no nodes in a network can be in a community by themselves using this approach, since all connected nodes necessarily have a closest friend. It may be possible to remove this restriction by introducing self-loops into the network, but we leave this to later work.

In Fig. S1(a), it is important to note that it is not possible to continuously tune an arbitrary parameter to find different partitions. Using modularity maximization with resolution parameter  $\gamma$  as an example, at  $\gamma = 1$  we expect to detect the correct partition of two communities. For  $\gamma \rightarrow 0$ , we expect to find only a single community, including all nodes in the network. *No* reasonable measure of closeness will ever produce this coarsest partition of Fig. S1(a), since it would require a node in  $c_1$  to feel closer to nodes it has *fewer* connections to than those it has many connections to. Regardless of the closeness measure chosen (and even if a tunable free parameter included in our the measure), a single community *can not* be detected using the CF approach so long as nodes feel closer to their neighbors than their

non-neighbors. The coarser partition of a single community is, however, readily detected using the hierarchical approach described in the text.

In Fig. S1(b), we show a pathological network topology for which the CF method will fail: two distinct communities with each node connected to a single, central node ( $\delta$ ). Most measures of closeness will find all nodes feel closest to  $\delta$  (and all reasonable measures will, so long as the intra-community edges are sufficiently sparse and the network sufficiently large), so the CF approach will assign all nodes to the same community as  $\delta$ . In such a case, only a single community will be (incorrectly) detected. This can be avoided by searching for the closest unpopular friend: after sorting nodes into ascending order of how close node  $i$  feels to them, the closest node with degree less than or equal to the next-closest is selected as  $f(i)$ . Note that for the closest unpopular friend algorithm on a weighted graph, we still search for lower degree  $k_i$  rather than strength  $W_i$ , which avoids nodes that are connected to many other nodes ( $k_i \gg 1$ ) but not nodes that are strongly connected to a few nodes ( $W_i \gg 1$ ). The node  $\delta$  is assigned to the community its closest unpopular friend is in, which will depend on the details of the network topology and the choice of closeness measure.

## 2 Fractured Communities

While the CF and CUF algorithms provides a intuitive method for detecting communities in an arbitrary graph, it is possible for a correct community to be fractured into two or more parts due to the local variability of the density of edges. As pictured in Fig. S2), an intended community  $A$  may be split into two groups,  $A_1$  and  $A_2$  due to the asymmetric connections each of these sub-communities has to the communities  $B$  and  $C$ . As pictured, there are either more edges leading from  $A_1$  to  $B$  than there are between  $A_1$  and  $C$  or the total weight between  $A_1$  and  $B$  is larger than between  $A_1$  and  $C$ . While useful information could be found in the structure of the fractured communities, is also desirable to recover the ‘correct’ communities despite these local variations. In order to produce a more useful method for community detection, we must supplement both of these approaches with an algorithm to merge fractured communities to better recover the ‘correct’ partition.

The fracture of communities can be due to two aspects of the detection: first, the decisions are purely local (even if the closeness measure incorporates the global topology). Because the decisions are not made with a global quality function, the splitting of a community into two pieces is not penalized. Second, the random nature of the networks allows for variability in the local density of edges. These fluctuations in density will affect all community detection methods[3], and in some cases may call into question the ‘correctness’ of the intended partition.

In Fig. S2, the detected groups  $A_1$  and  $A_2$  (which are in the same community in the

‘correct’ partition) will likely have a large number of edges between them. If we imagine a single community is mistakenly broken into two sub-communities of the same size ( $n$  nodes apiece), the number of edges between the sub-communities should scale as  $n^2$  (with a uniform density of edges in the correct community  $A$ ). This allows us to build a relatively simple greedy search for communities to merge. Once a CF or CUF partition has been determined, we perform a search for the pair of communities  $g$  and  $h$  with the largest value of  $k_{g \rightarrow h} / \max(n_g, n_h)^2$ , where  $k_{g \rightarrow h}$  is the number of edges leading from group  $g$  to group  $h$  and  $n_g$  is the number of nodes in group  $g$ . Before we merge the communities  $g$  and  $h$ , we check to ensure that  $k_{g \rightarrow h} \geq \min(k_{g \rightarrow g}, k_{g \rightarrow h})$ . If the inequality is not satisfied (i.e. there are fewer edges between  $g$  and  $h$  are in either  $g$  or  $h$  alone) the greedy search is halted, otherwise  $g$  and  $h$  are merged and the search repeats.

In Fig. S3, we use the GENs to compare the CF and CUF methods for with or without community merging (averaged over 100 realizations of the network). We see that the CUF approach with merging gives the best overall results, with the largest normalized mutual information[4, 5] (as defined in eq. 2 of the main text) for all values of  $k^{out}$ , with only a moderate improvement over the CF approach. However, the CUF approach is more prone to community fracture (where the black circles do not converge to  $I = 1$  as  $k^{out} \rightarrow 0$ ), and greedy merging is therefore essential for reliable reconstruction of the network. We note that the merging of fractured communities as implemented here could also be used with modularity maximizing methods and may improve the spurious splitting of communities in some cases.

As noted in Fig. S2, variability in the local density of edges can lead to fractured partitions. The propensity of modularity maximization for finding spurious sub-communities can perhaps be most clearly seen by considering a random network *without* any community structure. We generate networks with the probability of an edge between any nodes is  $p_{edge}$ , with  $0.04 \leq p_{edge} \leq 1$ . In Fig. S4, we show the number of communities detected in these networks using both greedy modularity maximization (squares) and the CUF approach (circles). The CUF performs far better than the greedy modularity maximization for  $p_{edge} \gtrsim 0.1$ , while modularity maximization consistently finds more than one community for all  $p_{edge} < 1$ . For small  $p_{edge}$ , we expect fluctuations in the edges will produce a locally higher density of edges randomly, which may be detected using any community detection method[6]. However, as  $p_{edge}$  increases, these fluctuations should be less significant, and the CUF that detects only a single community may be preferable.

### 3 A Common Hierarchical Benchmark

It is natural to define a coarse grained network formed with the communities in the higher-resolution partition acting as nodes in the new, lower-resolution network in order to detect

a hierarchy of community structure in the network. However, it is not immediately obvious how to choose the new edges in the new network, and rather than attempt to define coarse-grained edges at this resolution, we take the closeness between the coarse-grained nodes to be the average closeness between communities in the high-resolution partition. In the particular case of the GENs, the harmonic mean is the appropriate way to average the closeness, as the closeness between communities should be dominated by the nodes in each that feel close to one another (small  $E_{ij}$ , thus more significant in the harmonic mean), rather than the nodes that do not feel close to one another (large  $E_{ij}$ , less significant in the harmonic mean). For other closeness measures, a linear mean may be the more reasonable choice for averaging the closeness between communities.

It is worth re-emphasizing that we do not expect to be able to continuously tune the resolution of the coarse-grained network with a free parameter. Our ability to detect hierarchical structure of course depends on the accuracy of the higher resolution partition (with an inaccurate partition unlikely to accurately detect the correct macrocommunities), and the existence of a ‘correct’ hierarchical partition. If nodes in communities  $g$  and  $h$  are very close to one another in the original network, a reasonable method of averaging should ensure they are close in the coarse grained network. While the detected partition will weakly depend on the method of coarse graining, it is not possible to tune the averaging as it is in the case of modularity maximization (or other approaches), where choosing a resolution  $\gamma \ll 1$  will assign all coarse-grained nodes to the same community.

We apply our coarse graining approach to detect the community structure of the benchmark presented by Recharadt and Bornholdt [7] depicted in Fig. S5. The network of  $N = 512$  nodes is composed of 16 microcommunities with on average  $k^{in} = 16$  edges internally per node. Four of these microcommunities form a macrocommunity, with on average  $k^{out}$  edges per node within a macrocommunity and  $k^{mix}$  edges per node between macrocommunities. Note that this is the benchmark that is modified in order to produce the benchmark of variable robustness as described in the main text. The mutual information between the correct and detected partitions of the micro-communities (using the CUF approach with the GENs as the closeness measure) is shown in Fig. S6(a) for varying  $k^{out}$  and  $k^{mix}$ . The microcommunities are detected accurately for small  $k^{out}$ , with the transition from ‘good’ to ‘bad’ detection occurring for  $k^{out} + k^{mix} \approx 34$  (the point at which  $I = 0.5$ , averaged over the four curves shown), more than twice the value of  $k^{in} = 16$ . It is worth noting that for the larger values of  $k^{out}$  (12 or 14), often the failure to saturate to  $I = 1$  at  $k^{mix} = 0$  is due to the fact that the method will fail to detect the microcommunity structure of 16 communities, but rather the macrocommunity structure of 4 macrocommunities. For sufficiently dense connections within the macrocommunities, the CUF method does fail to detect the finest resolution of the network. However, so long as the microcommunities are accurately detected, the macrocommunity structure is also correctly determined (as shown in Fig. S6(b)). For  $k^{out} = 16$ , we generally fail to find the macrocommunity structure because of the poor detection of the fine-resolution structure, while for  $k^{out} = 12$  or 14, the

macrocommunity structure is not reliably found as  $k^{mix} \rightarrow 0$ . Modularity-based methods or other approaches may outperform these results[7, 8] if the correct (but a priori unknown) resolution parameter is chosen. However, our approach gives a single partition for each scale (both micro- and macro-), and performs very well so long as the micro-communities are not too fuzzy ( $k^{out}$  is sufficiently small), without using an unknown parameter.

## 4 Common Real-World Community Benchmarks

Modularity maximization performs quite well on the artificial GN benchmark precisely because of the modular structure inherent in the test: the correct solution was also the modularity maximizing one. This may not be the case in real world networks, where the ‘correct’ partition is determined from external information and is independent of the partition’s modularity. To see the utility of the CF or CUF methods, we examine three simple real-world benchmarks with an a priori known partition in the main text. The football network[9] is comprised of nodes representing american football teams, with edges denoting games played between them in 2000. The ‘correct’ partition groups each team within their externally-defined division. The political blogs network[10] is a set of blogs in the leadup to the 2006 US midterm election, with an edge representing a link from one blog to another (we use an undirected version of this network). The political books network[11] is a set of books purchased on amazon.com around the 2004 US presidential elections, with an edge representing a co-purchase of a pair of books. In the political blogs and books networks, the ‘correct’ partition is the node’s apparent political leaning: liberal vs. conservative in the former and liberal, independent, or conservative in the latter. All of these benchmarks are unweighted networks (with  $w_{ij} = 0$  or 1).

One common benchmark with a known community structure not mentioned in the main text is Zachary’s Karate club[12]. This is a very small network of 34 nodes representing members of a karate club at an unnamed university, with edges denoting the out-of-club interactions between individuals. The club split into two parts due to a disagreement over the club’s leadership, and the ‘correct’ partition denotes which individuals fell on a particular side of the disagreement. The karate club is partitioned using a number of approaches in Fig. S7, with from left to right modularity maximization, CF/CUF using the GENs, using the JCs, and using overlap. For the Karate club benchmark, we find surprisingly that both overlap and the GENs perform extremely poorly while the Jacard coefficients (JCs) perfectly reconstruct the correct partition. However, if the closest friend (CF) approach is used (rather than the closest unpopular friend approach, which avoids high degree nodes when assigning communities and is implemented throughout the main text), the GENs perfectly reconstruct the network, followed by overlap and then by the JCs. This illustrates that pathological networks do indeed exist that have not been fully accounted for in the CUF methodology, and it is difficult to predict exactly which method

will be optimal a priori. We also note that a CF partition can be generated rapidly when generating a CUF partition, and by examining a global quality function (such as modularity), one can easily distinguish which partition better represents the structure of the network. Thus, despite the unexpected behavior of our approach when considering the Karate Club network, we determine that (a) the GENs remain a reasonable choice for the closeness measure and (b) that it may be necessary to compare the results of the CUF approach to a global quality function (such as modularity) to determine if the partition is reasonable.

## 5 Simulated Annealing of the Benchmark

In order to generate the network used in benchmarking the community detection and robustness measure in the main text, we used simulated annealing to produce a network with the desired properties. The desired in-, out-, and mixing-degree of each node were computed:  $k_i^{in,0}$ , the desired number of edges from node  $i$  to nodes in its microcommunity,  $k_i^{out,0}$ , the desired number of edges leading from  $i$  to any node in its macrocommunity (but not in the microcommunity) and  $k_i^{mix,0}$ , the number of edges leading from  $i$  out of its macrocommunity. From these the total number of edges  $M = \frac{1}{2} \sum_i (k_i^{in,0} + k_i^{out,0} + k_i^{mix,0})$  was determined, and a network of  $N = 512$  nodes was generated having precisely  $M$  randomly distributed edges. The network was then randomly rewired, with a new trial configuration generated by removing one edge connecting the randomly chosen  $i$  and  $j$ , and a new edge being drawn between  $i$  and  $k$ . This trial configuration was accepted using a metropolis criterion:  $p_{acc} = \min(1, e^{-\beta(E_{old} - E_{trial})})$ , with the energy of a configuration

$$E = \frac{1}{2} \sum_i \left[ (k_i^{in} - k_i^{in,0})^2 + (k_i^{out} - k_i^{out,0})^2 + (k_i^{mix} - k_i^{mix,0})^2 \right] \quad (1)$$

where the first term of  $E$  is minimized if the in-, out-, and mix-degrees of each node satisfy our desired conditions. The temperature parameter  $\beta$  is set to  $\beta = 1$  initially, and incrementally increased by  $2 \times 10^{-5}$  at each attempted rewiring. A total of 500,000 rewiring attempts were made, with each edge on average experiencing  $\approx 975$  attempted rewirings.

## 6 How Ties are Handled

Unlike many real world networks, the network in Fig. S1(a) is highly symmetric and the closeness between nodes in groups A or B is likewise symmetric so that there is not a unique closest friend. In this case, we must develop a rule for handling ties in the closeness. In the case of a tie, we randomly but consistently select the ‘closest’ neighbor of  $i$ ,  $f(i)$ . This

is accomplished by initially randomizing the node index, and choosing the node with the lowest (random) index as closest. In practice, the importance of ties in the artificial or real world networks depends on the choice of closeness measure. The Jacard coefficient  $JC_{ij} = |C_i \cap C_j|/|C_i \cup C_j|$  can easily produce ties[13] for complex networks, whereas the GENs require highly symmetric networks to see a tie. The lack of ties is an additional advantage of measures that incorporate the global topology of the network, rather than purely local information.

## 7 Details of the DASH robustness

The DASH database, downloaded in June 2010 contained  $N_0 = 918$  journals and 2404 articles published by 3385 unique author names, not all of which work at Harvard. Because of the interdisciplinary and highly connected nature of the journals *Science*, *Nature*, and *Proc. Natl. Acad. Sci*, these three journals are removed from the network. This alteration does not alter the shape of either the degree or weight distributions (although the removal of edges does affect their particular fitting parameters).

While briefly discussed in the text, it is worthwhile to examine the structure of the DASH network in detail, to determine the power of the degree of robustness in finding complex topologies or incorrectly assigned nodes. When we examine the degrees of robustness observed in the network, nodes with few edges connecting them to their community have a correspondingly low degree of robustness, reflecting the fact that they are only weakly connected to their assigned community. Low values for the degree of robustness  $D_i^{(1)}$  for these weakly connected nodes is unsurprising. We can use the degree of robustness to find nodes that are on the boundary between communities (i.e. that are strongly connected both to their assigned community as well as to a different community to which they are not assigned). We find 142 nodes with  $D_i^{(1)} \leq 2$ , 53% of which have  $k_i^{in} \leq 2$  (indicating that they are simply of low degree, rather than on the boundary of a community). However, there are a few nodes that have  $D_i^{(1)} \leq 2$  but are strongly connected to their respective communities (having high degree and weight directed into  $c_i$ ). Due to their large values of  $k_i^{in}$ , these nodes are most likely on the boundary of their respective communities. The five journals with smallest  $D_1^{(i)}/k_i$  with  $D_i^{(1)} = 1$  or 2 are shown in Table S1. Some of these journals have a  $k_i^{in} \ll k_i$  (so many edges lead from  $i$  to different communities), while others have  $k_i^{in} \approx k_i$  (so most of the edges from  $i$  are within its assigned community).

Examining the topology of the DASH network connected to these nodes that are boundary-like shows two distinct causes of high in-degree and low degree of robustness. *Cognition*, the second journal in Table S1 has more than twice as many out-edges as in-edges, but these out-edges are distributed amongst a wide range of communities. In Table S1, *Cognition* has the most weight ( $W_i^{in} = 14$ ) directed towards its community (Phys. Sci. 4, primarily

focused on Oceanography and Atmospheric Science), but has a large weight of 12 directed towards the Phys. Sci. 3 community (focused primarily on Psychology and Neuroscience, a more natural choice of community assignment for *Cognition*). It is likely that this node was incorrectly assigned, but the fact that the highest weight points towards Phys. Sci. 4 makes the misassignment understandable. The degree of robustness has allowed us to locate this possible error with ease, while the in-degree ( $k_i^{in} = 8$ ), total degree, the ratio of in- to total degrees ( $k_i^{in}/k_i = 0.32$ , and is the 17<sup>th</sup> worst of all journals), or the ratio of in- to total strengths ( $W_i^{in}/W_i = 0.34$ , the 10<sup>th</sup> worst of all journals) would not highlight *Cognition* as a particularly troublesome node.

The other journals in Table S1 all have a low degree of robustness for a different reason. For these, the largest number of edges point towards their assigned communities, and in all but one case (the *Journal of Economic History*) the largest weights are also pointed towards their respective communities. However, in each case the journal is connected to the ‘core’ of a different community: nodes in a different community with both high in-weights or in-degrees and high robustness. While the assignment of each node in Table S1 to its respective community is often reasonable (since the majority of edges are within its assigned community), each of these nodes is also connected to one or more nodes that effectively define a neighboring community. These journals act as a bridge between the (generally less robust) communities to which they are assigned and the core of a robust, strongly connected community.

It is also of interest to determine the quality of the assignment of each microcommunity to its macrocommunity. The thin black lines in Fig. 2 of the main text denote the macrocommunity robustness  $r_c^{(2)} = \langle D_i^{(2)} \rangle_{i \in c}$  of each assignment. We note that a robust microcommunity (with high  $r_c = \langle D_i^{(1)} \rangle_{i \in c}$ ) does not necessarily imply a robust assignment to its macrocommunity, and that many well formed microcommunities have a very low value of  $r_c^{(2)}$ . Table S2 shows that the lowest values of  $r_c^{(2)}$  typically occur for communities that have relatively few out-edges (and thus their assignment to their macrocommunity is expected to be fragile). However, the assignment of the Philosophy and History 1 (PH1) microcommunity to its macrocommunity is surprising, as it has a very low ratio of in- to out-degree and in- to out-strength. While the placement of PH1 to the Philosophy and History macrocommunity may appear to be an error, the surprising assignment is due to the fact that 75% of the out-of-macrocommunity edges and 84% of the out-of-macrocommunity weight are due to only two journals: the strong connections that *Social Studies of Science* and *Annual Review of Sociology* have towards Mathematical Sciences 3 (also focused on the Social Sciences). There are three journals in PH1 that are connected to the Philosophy and History macrocommunity, *Isis*, *Persepectives on Science*, and *Journal of the History of Ideas*. Two of these journals are in the ‘core’ of PH 1 (with  $D^{(1)} = 17$ ), while only one of the journals strongly connected to Math. Sci. is in the core (with  $D^{(1)} = 16$ ). Thus, the assignment of PH1 to the Philosophy and History macrocommunity is due to



the fact that, while more weight is directed out of the assigned macrocommunity, the core journals of PH1 are more strongly connected to Philosophy and History journals. PH 1 is clearly boundary-like, and our robustness measure of  $r_c^{(2)}$  accurately detects this fragile assignment.

## 8 Additional details of the Phys. Rev. Network

The Physical Review network included over 462,000 articles published in any Physical Review journal up to July 2010. Due to the size of the network, we consider only the subset of articles that have garnered at least 100 citations, with the largest connected component including 3651 articles and over 16,000 edges. While the network is unweighted (one citation is neither stronger nor weaker than another, thus  $w_{ij} = 0$  or  $1$ ) and directed (article  $i$  cites article  $j$ , but not vice-versa), we consider the non-directed version (with  $w_{ij} = w_{ji} = 0$  or  $1$ ). The community structure at one resolution of the Phys. Rev. network up to 2007 has previously been determined[14]. The detected communities are similar in many respects to the community structure we have detected, although these other papers did not report an examine of any additional hierarchical structure, as we discuss in the main text.

## References

- [1] Adamic L, Adar E (2001) Friends and neighbors on the web. *Social Net* 25: 211-230.
- [2] Wu F, Huberman B (2004) Finding communities in linear time: a physics approach. *The European Physical Journal B-Condensed Matter and Complex Systems* 38: 331–338.
- [3] Sun Y, Danila B, Josic K, Bassler KE (2009) Improved community structure detection using a modified fine-tuning strategy. *Europhys Lett* 86: 28004.
- [4] Lancichinetti A, Fortunato S, Radicchi F (2008) Benchmark graphs for testing community detection algorithms. *Phys Rev E* 78: 46110.
- [5] Guimerà R, Sales-Pardo M, Amaral L (2007) Module identification in bipartite and directed networks. *Physical Review E* 76: 36102.
- [6] Guimera R, Sales-Pardo M, Amaral LAN (2008) Modularity from fluctuations in random graphs and complex networks. *Phys Rev E* 70: 025101.
- [7] Reichardt J, Bornholdt S (2006) Statistical mechanics of community detection. *Physical Review E* 74: 16110.

- [8] Lancichinetti A, Fortunato S, Kertész J (2009) Detecting the overlapping and hierarchical community structure in complex networks. *New Journal of Physics* 11: 033015.
- [9] Girvan M, Newman M (2002) Community structure in social and biological networks. *Proceedings of the National Academy of Sciences of the United States of America* 99: 7821.
- [10] Adamic LA, Glance N (2005) The political blogosphere and the 2004 us election. *Proceedings of the WWW-2005 Workshop on the Weblogging Ecosystem* .
- [11] Krebs V. <http://www-personal.umich.edu/~mejn/netdata/>, maintained by M. E. J. Newman.
- [12] Zachary W (1977) An information flow model for conflict and fission in small groups. *Journal of Anthropological Research* 33: 452–473.
- [13] Ahn YY, Bagrow JP, Lehmann S (2010) Link communities reveal multiscale complexity in networks. *Nature* 466: 761–764.
- [14] Chen P, Redner S (2010) Community structure of the physical review citation network. *J Infometrics* 4: 278.

## Figure Captions and Tables

Figure S1: Detecting communities with the CF and CUF methods. (a) An example of two clearly defined communities ( $c_1$  and  $c_2$ ), each of size  $N/2$  with exactly one edge connecting them. Any plausible measure of closeness based on the network topology will clearly distinguish between intra- and inter-community connections. The closeness between nodes within the community as measured by the GENs ( $E^{in}$ ), JCs ( $J^{in}$ ), and overlap ( $O^{in}$ ), with  $|c|$  the number of nodes in each community. Likewise, the closeness between nodes in different communities is shown with the superscript ‘out’. (b) A schematic network of a single highly connected node ( $\delta$ ) to which all nodes in the network will feel closest. Assigning each node to the same community as their closest friend (the CF approach) will assign all nodes to the same community as  $\delta$ , thus detecting only one community. By avoiding high-degree nodes (the CUF approach), the two communities are correctly detected, with  $\delta$  assigned to one or the other.

Figure S2: Merging of fractured communities. Community  $A$  is fractured into two communities,  $A_1$  and  $A_2$  due to the fact that  $A_1$  is more strongly connected to  $B$  (connections labelled ‘stronger’) than to  $C$  (connections labelled ‘weak’), while community  $A_2$  is more strongly connected to  $C$  than  $B$ . In this coarse-grained schematic, ‘stronger’ may represent either high weight or many edges between them. Because  $A_1$  and  $A_2$  are truly subsets of the same community in the ‘correct’ partition, we expect a large number of edges between them.

Figure S3: Improvements in the methods using fracture merging. A comparison of the approaches for community detection using the GENs, using the Newman-Girvan benchmark. Red squares denote the CUF after community merging, which gives the best overall results. Black circles denotes the result of the CUF without merging, and has a low mutual information to the expected partition due to fracture (even for clear communities, with low  $k^{mix}$ ). The blue up and purple down triangles are the results for the CF algorithm with and without fracture correction, respectively.

Figure S4: Community detection in unstructured networks. The number of communities  $n_c$  detected using greedy modularity maximization (up and down triangles) or the CUF method (squares and circles) for a randomly linked network (with no intended community structure) as a function of the probability of an edge between two nodes,  $p_{edge}$ . Greedy modularity maximization is shown in the purple down triangles for  $N = 100$  nodes and black up triangles for  $N = 200$  nodes, while the blue circles shows CUF detection for  $N = 100$  and red squares for CUF with  $N = 200$ . When there is no intended structure in the network, modularity maximization tends to find a relatively large number of communities, while the CUF method typically finds only one community (for sufficiently large  $p_{edge} \gtrsim 0.1$ ).

Figure S5: The adjacency matrix of the Reichardt-Bornholdt hierarchical benchmark. Each node is a member of a micro-community of 32 nodes, with  $k^{in} = 16$  connections to the other nodes in its micro-community on average. Each micro-community is a member of one of four macro-communities, and each node in a macro-community has  $k^{out}$  edges internally on average. Each node has on average  $k^{mix}$  edges to nodes outside of their macro-community.

Figure S6: Accuracy of the hierarchical benchmark. The detection of (a) micro- and (b) macro-communities averaged over 100 realizations of the network. For all samples,  $k^{in} = 16$  is held fixed.  $k^{out}$  is varied as  $k^{out} = 8$  (blue circles), 10 (red squares), 12 (black up triangles) and 14 (purple down triangles). The mixing between macrocommunities is varied with  $2 \leq k^{mix} \leq 30$ . The CUF approach accurately detects the microcommunities over a wide range of values of  $k^{out}$  and  $k^{mix}$ , and is clearly able to accurately detect the microcommunity structure for sufficiently clear communities. So long as the microcommunity structure is accurately detected, the macrocommunity structure seems reliably determined as well.

Figure S7: The karate club network. Mutual information (a) and modularity (b) of the partitions of the Karate club[12] detected by a variety of approaches, with the a priori correct partition known. The leftmost results show the results of partitions using the greedy (striped red) and Potts model (striped blue) modularity maximizing partitions. For the remainder, red denotes the closest friend (CF) while blue denotes the closest unpopular friend (CUF) approach, with the GENs, JCs, and overlap shown. Surprisingly, the GENs implemented using the CUF method performs the worst in all respect (in contrast to most other benchmarks where it performs the best). For the Karate club network, the GENs do reconstruct the exact ‘correct’ partition if the CF method is used.

| Name           | Community    | $D_i^{(1)}$ | $k_i^{in}$ | $k_i$ | $W_i^{in}$ | $W_i$ |
|----------------|--------------|-------------|------------|-------|------------|-------|
| J. Econ. Hist. | Math. Sci. 3 | 2           | 16         | 24    | 71         | 157   |
| Cognition      | Phys. Sci. 4 | 1           | 8          | 25    | 14         | 41    |
| Ecol. Appl.    | Phys. Sci. 5 | 1           | 8          | 10    | 18         | 22    |
| Oikos*         | Phys. Sci. 5 | 1           | 8          | 10    | 18         | 22    |
| Brit. Med. J.  | Math. Sci. 6 | 2           | 14         | 15    | 29         | 32    |

\*Oikos is an ecology journal published by the Nordic Ecol. Soc., and has exactly the same connections as Ecol. Appl.

Table S1: The five most boundary-like nodes (with the lowest non-zero values of  $D_i^{(1)}/k_i^{in}$ ). The first, *J. Econ. Hist.*, has a high degree and strength and large  $k_i^{in}$  and  $k_i^{out}$ . Similarly, *Cognition* has the smallest ratio of in-edges to total node degree, and is connected to a large number of other communities. The last three elements in the table are surprising in that they have a few connections outside of their communities ( $k_i^{out} = 1$  or  $2$  compared to  $k_i^{in} = 8$  or  $10$ ) but still have low degrees of robustness. This is because while they have many in-community connections, their few out-of-community connections lead to strong, central nodes in other communities. These boundary-like nodes would not be easily detected by simply looking at the in-degrees or in-out ratio.

| Community       | Focus            | $r_c^{(2)}$ | $k_c^{in}$ | $W_c^{in}$ | $k_c^{out}$ | $W_c^{out}$ |
|-----------------|------------------|-------------|------------|------------|-------------|-------------|
| Phil. & Hist. 1 | History          | 0.12        | 3          | 7          | 28          | 45          |
| Phys. Sci. 13   | Info. Theory     | 0.2         | 1          | 1          | 0           | 0           |
| Math. Sci. 10   | Drug Addiction   | 0.25        | 1          | 1          | 0           | 0           |
| Math. Sci. 11   | Crystallography  | 0.33        | 1          | 1          | 0           | 0           |
| Phys. Sci. 9    | High En. Physics | 0.38        | 3          | 6          | 0           | 0           |

Table S2: The five least robust macrocommunity assignments.  $k_c^{in}$  and  $W_c^{in}$  denote the total number of edges and total weight from the microcommunity to other microcommunities in its macrocommunity respectively, while  $k_c^{out}$  and  $W_c^{out}$  denote the total number and weight of edges into any other macrocommunity. Philosophy and History 1 (PH 1) is the worst, and lies on the boundary of the Philosophy and History macrocommunity and the Mathematical Sciences macrocommunity. The other macrocommunity assignments are very fragile do to the very small number of connections, and are peripheral microcommunities.

## Community Membership of the DASH Network

| Natural Sciences, Community 1          |                                        |                                        |
|----------------------------------------|----------------------------------------|----------------------------------------|
| Accounts of Chemical Research          | ACS Nano                               | Acta Materialia                        |
| Advanced Materials                     | Animal Behavior                        | Annals of Applied Statistics           |
| Annals of Statistics                   | Applied and Environmental Microbiol... | Applied Physics A                      |
| Applied Physics Letters                | Behavioral Ecology and Sociobiology    | BMC Genomics                           |
| Chemistry and Biology                  | Defect and Diffusion Forum             | Environmental Science and Technolog... |
| IEEE Journal of Quantum Electronics    | IEEE Journal of Selected Topics in ... | IEEE Photonics Technology Letters      |
| International Journal of Primatolog... | Journal of Applied Physics             | Journal of Archeological Science       |
| Journal of Bacteriology                | Journal of Chemical Physics            | Journal of Computer Aided Materials... |
| Journal of Crystal Growth              | Journal of Dramatic Theory and Crit... | Journal of Materials Science           |
| Journal of Microelectromechanical S... | Journal of Physical Chemistry C        | Journal of Physics: Condensed Matte... |
| Journal of the American Chemical So... | Journal of The Electrochemical Soci... | Journal of Vacuum Science and Techn... |
| Journal of Vacuum Science & Techno...  | Lab on a Chip                          | Materials Research Society Symposia... |
| Materials Science and Engineering      | Materials Science and Engineering A    | Materials Science in Semiconductor ... |
| Metallurgical and Materials Transac... | Microbiology                           | Modern Drama                           |
| Molecular and Cellular Biology         | Molecular Biology and Evolution        | MRS Bulletin                           |
| Nano Letters                           | Nanoscale Research Letters             | Nanotechnology                         |
| Nature Biotechnology                   | Nature Methods                         | Nature Physics                         |
| New Journal of Physics                 | Nuclear Instruments and Methods in ... | Nuclear Instruments and Methods in ... |
| Nucleic Acids Research                 | Optics and Photonics News              | Optics Express                         |
| Optics Letters                         | Physica C                              | Physical Review A                      |
| Physical Review B                      | Physical Review D                      | Physical Review Letters                |
| Plant Cell and Environment             | Proceedings of SPIE                    | Progress in Biophysics and Molecula... |
| Social Text                            | The Open Inorganic Chemistry Journa... | Trends in Ecology and Evolution        |

| Natural Sciences, Community 2          |                                        |                                        |
|----------------------------------------|----------------------------------------|----------------------------------------|
| ACM SIGCSE Bulletin                    | American Journal of Botany             | American Journal of Science            |
| Annual Review of Earth and Planetar... | Annual Review of Ecology, Evolution... | Annual Review of Microbiology          |
| Astrobiology                           | Canadian Journal of Earth Sciences     | Canadian Journal of Forest Research... |
| Chemical Geology                       | Earth and Planetary Science Letters    | Elements                               |
| Geobiology                             | Geochemistry Geophysics and Geosyst... | Geochimica et Cosmochimica Acta        |
| Geological Magazine                    | Geological Society of America Bulle... | Geology                                |
| Harvard Papers in Botany               | Icarus                                 | International Journal of Plant Scie... |
| International Workshop on Wearable ... | Journal of Geophysical Research - P... | Journal of Mathematical Biology        |
| Journal of Paleontology                | Journal of Petrology                   | Journal of Plant Growth Regulation     |
| Lethaia                                | Nature Reviews Neuroscience            | New Phytologist                        |
| Oceanography                           | Organic Geochemistry                   | Origins of Life                        |
| Origins of Life and Evolution of th... | Palaios                                | Paleobiology                           |
| Philosophical Transactions of the R... | Physical Review                        | Physics Today                          |
| Phytochemistry                         | Plant Physiology                       | Plos One                               |
| Precambrian Research                   | Proceedings of the American Philoso... | Review of Scientific Instruments       |
| Sedimentary Geology                    | Taxon                                  | The Sciences                           |

| Natural Sciences, Community 3          |                                        |                                        |
|----------------------------------------|----------------------------------------|----------------------------------------|
| American Journal of Psychiatry         | Archives of Neurology                  | Biological Psychology                  |
| California Law Review                  | Cognitive Brain Research               | Cognitive Neuropsychology              |
| Current Directions in Psychological... | Developmental Biology                  | European Review of Social Psycholog... |
| IEEE Transactions on Information Te... | Journal of Adult Development           | Journal of Cognitive Neuroscience      |
| Journal of Consulting and Clinical ... | Journal of Experimental Psychology:... | Journal of Experimental Psychology ... |
| Journal of General Internal Medicin... | Journal of Mathematical Psychology     | Journal of Neurophysiology             |
| Journal of Neuroscience                | Journal of Personality and Social P... | Journal of Physiology - Paris          |
| Journal of the American Academy of ... | Journals of Gerontology Series B       | Language and Cognitive Processes       |
| Memory & Cognition                     | Mind, Brain, and Education             | Molecular Psychiatry                   |
| New Ideas in Psychology                | Personality and Individual Differen... | Personality and Social Psychology B... |
| Perspectives on Psychological Scien... | Psychiatry Research                    | Psychological Science                  |
| Psychology and Aging                   | Psychoneuroendocrinology               | Psychonomic Bulletin & Review          |
| Public Opinion Quarterly               | Review of General Psychology           | Self and Identity                      |
| Small Group Research                   | Social Cognitive and Affective Neur... | Trends in Cognitive Sciences           |
|                                        | Visual Cognition                       |                                        |



| Natural Sciences, Community 4          |                                         |                                     |
|----------------------------------------|-----------------------------------------|-------------------------------------|
| Aerosol Science and Technology         | Agricultural and Forest Meteorology     | Atmospheric Chemistry and Physics   |
| Atmospheric Environment                | Child Development                       | Cladistics                          |
| Climate of the Past                    | Cognition                               | Cognitive Psychology                |
| Computers and Geosciences              | Cortex                                  | Current Biology                     |
| Deep Sea Research Part A. Oceanogra... | Dynamics of Atmospheres and Oceans      | Earth Science Reviews               |
| ECS Transactions                       | Europhysics Letters                     | General Psychologist                |
| Geophysical Research Letters           | Global Biogeochemical Cycles            | Global Biogeochemical Sciences      |
| Global Change Biology                  | Intercultural Pragmatics                | Journal de Physique IV              |
| Journal of Climate                     | Journal of Fluid Mechanics              | Journal of Geophysical Research     |
| Journal of Geophysical Research -Al... | Journal of Marine Research              | Journal of Physical Oceanography    |
| Journal of the Atmospheric Sciences    | Molecular Phylogenetics and Evolutio... | Monthly Weather Review- Usa         |
| Nature Geoscience                      | Paleoceanography                        | Philosophy and Literature           |
| Quarterly Journal of the Royal Mete... | Quaternary Science Reviews              | Statistics in Medicine              |
| Systematic Biology                     | The Mental Lexicon                      | Theoretical and Applied Climatology |

| Natural Sciences, Community 5      |                                  |                                        |
|------------------------------------|----------------------------------|----------------------------------------|
| Bioinformatics                     | Biology Letters                  | BMC Biochemistry                       |
| BMC Biology                        | BMC Ecology                      | Breviora                               |
| Canadian Journal of Zoology        | Ecological Applications          | Ecology                                |
| Ecology Letters                    | Evolution                        | Frontiers in Ecology and the Enviro... |
| Global Ecology and Biogeography    | Herpetologica                    | Journal of Evolutionary Biology        |
| Journal of Experimental Botany     | Journal of Theoretical Biology   | Journal of Vertebrate Paleontology     |
| Malaria Journal                    | Methods in Ecology and Evolution | Molecular Ecology                      |
| Oikos                              | Physical Review Series e         | Plos Computational Biology             |
| Proceedings of the Royal Society B |                                  | Theoretical Population Biology         |

| Natural Sciences, Community 6          |                                        |                                    |
|----------------------------------------|----------------------------------------|------------------------------------|
| American Journal of Human Biology      | American Journal of Physical Anthro... | Cancer Causes and Control          |
| Cancer Epidemiology Biomarkers and ... | Cancer Research                        | Early Human Development            |
| European Journal of Cancer Preventi... | European Journal of Cancer Suppleme... | Evolution and Development          |
| Evolutionary Biology                   | Fertility and Sterility                | Hormones and Behavior              |
| Human Reproduction                     | Integrative and Comparative Biology    | International Journal of Andrology |
| Journal of Anatomy                     | Journal of Experimental Biology        | Journal of Human Evoluion          |
| Journal of Morphology                  | Medicine and Science in Sports and ... | PaleoAnthropology                  |
| Schizophrenia Research                 | Sports Medicine                        | The Anatomical Record              |

| Natural Sciences, Community 7     |                                        |                                        |
|-----------------------------------|----------------------------------------|----------------------------------------|
| Applied and Preventive Psychology | Behaviour Research and Therapy         | Biological Psychiatry                  |
| Consciousness and Cognition       | Emotion                                | Journal of Anxiety Disorders           |
| Journal of Consumer Research      | Journal of Experimental Social Psyc... | Journal of Family Psychology           |
| Journal of Personality Disorders  | Journal of Psychiatric Research        | Memory                                 |
| Neuroimage                        | Neuropsychologia                       | Psychological Medicine                 |
| Psychopharmacology                | Psychophysiology                       | Suicide and Life-Threatening Behavi... |
|                                   | The American Journal of Psychiatry     |                                        |

| Natural Sciences, Community 8          |                                        |                                        |
|----------------------------------------|----------------------------------------|----------------------------------------|
| American Naturalist                    | Auk                                    | Bioscience                             |
| BMC Evolutionary Biology               | Genetical Research                     | Genetics                               |
| Genome Biology                         | International Journal of Plant Scie... | Journal of Experimental Zoology Par... |
| Philosophy of Science -East Lansing... | Plant Cell                             | Plant Methods                          |
| Quarterly Review of Biology            | Trends in Genetics                     | Yeast                                  |

| Natural Sciences, Community 9          |                         |                                        |
|----------------------------------------|-------------------------|----------------------------------------|
| Advances in Theoretical and Mathema... | Annals of Physics       | Annual Review of Nuclear and Partic... |
| Classical and Quantum Gravity          | Fortschritte der Physik | General Relativity and Gravitation     |
| Journal of High Energy Physics         |                         | Nuclear Physics B                      |

| Natural Sciences, Community 10      |                               |                                        |
|-------------------------------------|-------------------------------|----------------------------------------|
| ACM Transactions on Sensor Networks | Annual Review of Neuroscience | Cerebral Cortex -New York- Oxford U... |
| Experimental Brain Research         | Neuron                        | PLoS Biology                           |
|                                     | The Journal of Neuroscience   |                                        |

| Natural Sciences, Community 11    |                                        |                                        |
|-----------------------------------|----------------------------------------|----------------------------------------|
| ACM SIGPLAN Notices               | Annual Symposium on Principles of P... | International Conference on Functio... |
| Journal of Functional Programming | Proceedings of the 25th ACM SIGPLAN... | Proceedings of the 26th ACM SIGPLAN... |
|                                   | Proceedings of the ACM SIGPLAN 1996... |                                        |

| Natural Sciences, Community 12         |                                        |                    |
|----------------------------------------|----------------------------------------|--------------------|
| Antiquity                              | Archaeological Papers of the Americ... | Asian Perspectives |
| Backdirt: Annual Review of the Cots... | Current Anthropology                   | Symbols            |

| Natural Sciences, Community 13         |                                 |                                        |
|----------------------------------------|---------------------------------|----------------------------------------|
| IEEE Journal of Selected Areas in C... | IEEE Signal Processing Magazine | IEEE Transactions on Information Th... |
| IEEE Transactions on Signal Process... |                                 | IEEE Transactions on Wireless Commu... |

| Natural Sciences, Community 14         |                                  |                               |
|----------------------------------------|----------------------------------|-------------------------------|
| Cell                                   | European Journal of Biochemistry | Molecular Biology of the Cell |
| Nature Structural and Molecular Bio... |                                  | Structure                     |

## Mathematical Sciences, Community 1

|                                        |                                        |                                        |
|----------------------------------------|----------------------------------------|----------------------------------------|
| 4th Multidisciplinary Workshop on A... | AAAI Fall Symposium on Negotiation ... | AAAI Spring Symposium on Empirical ... |
| American Economic Journal: Microeco... | American Economic Review               | American Journal of Computational L... |
| American Sociological Review           | Annual Review of Economics             | Applied Economics Research Bulletin    |
| Artificial Intelligence                | Autonomous Agents and Multi-Agent S... | Brookings Papers on Economic Activi... |
| Canadian Journal of Economics          | Carnegie-Rochester Conference Serie... | China Economic Review                  |
| Cognitive Systems Research             | Computational Management Science       | Computers & Operations Research        |
| Contributions in Macroeconomics        | Decision Support Systems               | Econometrica                           |
| Economia mexicana                      | Economic Journal                       | Economic Policy                        |
| Economics of Transition                | European Economic Review               | European Finance Review                |
| Explorations in Economic History       | Foreign Affairs                        | Games and Economic Behavior            |
| Handbook of Macroeconomics             | Health Services Research               | IEEE Infocom                           |
| IEEE Intelligent Systems               | Information Fusion                     | International Journal of Game Theor... |
| Journal of Artificial Intelligence ... | Journal of Business and Economic St... | Journal of Business -Chicago-          |
| Journal of Economic Dynamics and Co... | Journal of Economic Literature         | Journal of Economic Perspectives       |
| Journal of Economic Theory             | Journal of Empirical Finance           | Journal of Epidemiology and Communi... |
| Journal of Finance                     | Journal of Financial Economics         | Journal of Health Economics            |
| Journal of International Economics     | Journal of Law and Economics -Chica... | Journal of Mathematical Economics      |
| Journal of Monetary Economics          | Journal of Money, Credit and Bankin... | Journal of Policy Modeling             |
| Journal of Political Economy           | Journal of Public Economics            | Journal of Public Policy and Market... |
| Journal of the European Economic As... | Journal of Urban Economics             | Management Science                     |
| National tax journal                   | National Tax Journal                   | NBER Macroeconomics Annual             |
| Nber Working Paper Series              | NBER Working Paper Series              | New York Review of Books               |
| Operating Systems Review               | Proceedings 35th International Conf... | Proceedings of Autonomous Agents an... |
| Proceedings of the 2006 AAAI Spring... | Proceedings of the 21st Annual Mee...  | Proceedings of the Conference on Ap... |
| Proceedings of the DARPA Workshop o... | Proceedings of the Eighteenth Inter... | Proceedings of the Eighth National ... |
| Proceedings of the First Internatio... | Proceedings of the First Joint Conf... | Proceedings of the Multi-Agent Sequ... |
| Proceedings of the Nineteenth Annu...  | Proceedings of the Sixth Internatio... | Proceedings of the Workshop on Theo... |
| Public Choice                          | Quarterly Journal of Economics         | Rand Journal of Economics              |
| Rationality and Society                | Review of Economic Dynamics            | Review of Economics and Statistics     |
| Review of Economic Studies             | Review of Financial Studies            | Tax Policy and the Economy             |
| The B.E. Journal of Macroeconomics     | The Economic Journal                   | The Lancet                             |
| Theoretical Economics                  | University of Chicago Law Review       | WIDER Research Paper                   |

| Mathematical Sciences, Community 2     |                                        |                                        |
|----------------------------------------|----------------------------------------|----------------------------------------|
| ACM Transactions on Graphics           | Cartographica                          | Communications of the Association f... |
| Computational Intelligence             | Computational Linguistics              | Computing Surveys                      |
| Electronic Commerce Research and Ap... | Formal Grammar Conferences             | Future Generation Computer Systems     |
| IEEE Computer Graphics and Applicat... | IEEE Transactions on Visualization ... | Information Technology                 |
| Journal of Biomedical Informatics      | Journal of Heuristics                  | Journal of Linguistics                 |
| Journal of Logic Programming           | Journal of Optimization Theory and ... | Journal of Psycholinguistic Researc... |
| Library Quarterly                      | Linguistics and Philosophy             | Natural Language Engineering           |
| Nos                                    | Proceedings of ACL-08: HLT             | Proceedings of Algorithms and Exper... |
| Proceedings of Graph Drawing           | Proceedings of SIGGRAPH                | Proceedings of the 10th Annual Symp... |
| Proceedings of the 10th Internation... | Proceedings of the 11th Conference ... | Proceedings of the 19th Internation... |
| Proceedings of the 2003 Internation... | Proceedings of the 2005 ACL Worksho... | Proceedings of the 7th Conference o... |
| Proceedings of the Eighteenth Inter... | Proceedings of the Eighth Internati... | Proceedings of the Eighth Internati... |
| Proceedings of the Fifth SIGdial Wo... | Proceedings of the First Workshop o... | Proceedings of the Human Language T... |
| Proceedings of the ICAPS-05 Worksho... | Proceedings of the Intelligent User... | Proceedings of the Ninth Internatio... |
| Proceedings of the Second TAG Works... | Proceedings of the Seventh Internat... | Proceedings of the Seventh Internat... |
| Proceedings of the Sixth Internatio... | Proceedings of the Thirteenth Annu...  | Proceedings of the Twenty-First Nat... |
| Proceedings of the Workshop on Synt... | Proceedings of UIST                    | Transactions on Graphics               |
|                                        | Transactions on Systems, Man and Cy... |                                        |

| Mathematical Sciences, Community 3     |                                        |                                        |
|----------------------------------------|----------------------------------------|----------------------------------------|
| Agricultural History                   | American Journal of Political Scien... | American Political Science Review      |
| Annals of the American Academy of P... | Annual Review of Psychology            | BioSocieties                           |
| British Journal of Political Scienc... | Dissent                                | D-Lib Magazine                         |
| Economic Development and Cultural C... | Economics & Politics (Oxford, Engl...  | Educational Policy                     |
| Genewatch                              | IMF Staff Papers                       | Indiana Journal of Global Legal Stu... |
| International Organization             | International Studies Perspectives     | Journal of Conflict Resolution         |
| Journal of Economic History            | Journal of Labor Economics             | Journal of Legal Studies               |
| Journal of Policy History              | Journal of Politics                    | Journal of Social Issues               |
| Journal of Statistical Software        | Medical Anthropology                   | Negotiation Journal                    |
| Perspectives on Politics               | PLoS Medicine                          | Political Analysis                     |
| Population Health Metrics              | PS: Political Science and Politics     | Research in Higher Education           |
| Social Justice Research                | Social Research                        | Social Science and Medicine            |
| Social Science History                 | Social Science Research                | Sociological Methods and Research      |
| Statistical Science                    | Studies in American Political Devel... | The American Sociologist               |
| The Annals of the American Academy ... | The Good Society                       | The Political Quarterly                |
| World Politics                         |                                        | Yale Journal of International Law      |

### Mathematical Sciences, Community 4

|                                        |                                        |                                        |
|----------------------------------------|----------------------------------------|----------------------------------------|
| Acta Mathematica -Stockholm-           | Advances in Mathematics                | American Journal of Mathematics        |
| Annales Academiae Scientiarum Fenni... | Annales Scientifiques- Ecole Normal... | Annals of Mathematics                  |
| Applied and Computational Harmonic ... | Biological Cybernetics                 | Bulletin- American Mathematical Soc... |
| Commentarii Mathematici Helvetici      | Communications on Pure and Applied ... | Discrete and Computational Geometry    |
| Documenta Mathematica                  | Duke Mathematical Journal              | Electronic Journal of Combinatorics    |
| Experimental mathematics               | Foundations and Trends in Computer ... | Geometric and Functional Analysis      |
| Harvard College Mathematics Review     | IEEE Transactions on Biomedical Eng... | IEEE Transactions on Pattern Analys... |
| International Journal of Computer V... | Inventiones mathematicae               | Journal- American Mathematical Soci... |
| Journal fur die Reine und Angewandt... | Journal of Algebra                     | Journal of Number Theory               |
| Journal of the European Mathematica... | Journal of the Optical Society of A... | Journal of Topology                    |
| Manuscripta Mathematica                | Mathematical Research Letters          | Mathematische Annalen                  |
| Nagoya Mathematical Journal            | New York Journal of Mathematics        | Pacific Journal of Mathematics         |
| Periodica Mathematica Hungarica        | Proceedings- American Mathematical ... | Proceedings of the Thirty-Fifth Ann... |
| Publications Mathematiques de l'Ins... | The Harvard College Mathematics Rev... | Topology                               |
| Transactions- American Mathematical... |                                        | Vision Research -Oxford-               |

### Mathematical Sciences, Community 5

|                                        |                                        |                                        |
|----------------------------------------|----------------------------------------|----------------------------------------|
| ACM International Conference Procee... | Annual Symposium on Foundations of ... | Computational Complexity               |
| Computer Aided Geometric Design        | Computer Graphics and Applications     | Computer Graphics Forum                |
| Computers and Graphics                 | Eurographics/SIGGRAPH symposium on ... | Information and Computation            |
| International Journal of Image and ... | International Mathematics Research ... | Journal of Computer & System Scien...  |
| Lecture Notes in Computer Science      | MM: Proceedings of the seventh ACM ... | Proceedings of the 15th Internation... |
| Proceedings of the Annual ACM Sympo... | Proceedings of the Canadian Confere... | SIAM Journal on Computing              |
|                                        | The Visual Computer: International ... |                                        |

### Mathematical Sciences, Community 6

|                                        |                                 |                                        |
|----------------------------------------|---------------------------------|----------------------------------------|
| Argumentation                          | ARL: A Bimonthly Report         | BMJ: British Medical Journal           |
| College & Research Libraries News      | Earlhamite                      | Infection Control and Hospital Epid... |
| Journal of Biology                     | Journal of Law and Education    | Journal of Speculative Philosophy      |
| Legal Writing: The Journal of the L... | New England Journal of Medicine | Newsletter on Teaching Philosophy      |
| Philosophy and Rhetoric                | SPARC Open Access Newsletter    | St. John's Review                      |

### Mathematical Sciences, Community 7

|                                  |                                        |                                    |
|----------------------------------|----------------------------------------|------------------------------------|
| Administrative Science Quarterly | American Journal of Sociology          | American Psychologist              |
| Crime and Justice                | Du Bois Review                         | Journal of Organizational Behavior |
| Research Evaluation              | Science, Technology and Human Value... | Social Service Review              |

### Mathematical Sciences, Community 8

|                         |                                   |                                        |
|-------------------------|-----------------------------------|----------------------------------------|
| American Statistician   | Biometrika                        | Journal – American Statistical Ass...  |
| Journal of Econometrics | Journal of Educational Psychology | NBER Technical Working Paper           |
| Psychological Methods   |                                   | Working paper series (National Bure... |

### Mathematical Sciences, Community 9

|                                        |                                        |                                   |
|----------------------------------------|----------------------------------------|-----------------------------------|
| Computer Architecture News             | Proceedings of the 2005 INFOCOM 24t... | Systems Administration Conference |
| www.eecs.harvard.edu/ margo/papers/... |                                        |                                   |

### Mathematical Sciences, Community 10

|                         |                                       |                           |
|-------------------------|---------------------------------------|---------------------------|
| Addictive Behaviors     | American Journal of Drug and Alcho... | Behavior Research Methods |
| Learning and Motivation |                                       |                           |

### Mathematical Sciences, Community 11

|                                        |                     |                     |
|----------------------------------------|---------------------|---------------------|
| Acta Crystallographica Section C: C... | Chemistry & Biology | Tetrahedron Letters |
|----------------------------------------|---------------------|---------------------|

### History / Philosophy, Community 1

|                                        |                                    |                                        |
|----------------------------------------|------------------------------------|----------------------------------------|
| American Historical Review             | American Scientist                 | Annals of Science                      |
| Annual Review of Sociology             | Architectural History              | British Journal for the History of ... |
| Bulletin of the History of Medicine    | Central European History           | Common Knowledge                       |
| Configurations                         | Contemporary European History      | Historical Journal                     |
| History of Science                     | International Migration Review     | Isis                                   |
| Journal of British Studies             | Journal of the History of Biology  | Journal of the History of Ideas        |
| Journal of Visual Culture              | Modern Language Notes              | Oxford Review of Education             |
| Past and Present                       | Perspectives on Science            | Public Understanding of Science        |
| Science in Context                     | Science Studies                    | Shakespeare Survey                     |
| Social Forces                          | Social Studies of Science          | The British Journal for the History... |
| The British Medical Journal            | The International Migration Review | Transactions of the Institute of Br... |
| Transactions of the Royal Historica... |                                    |                                        |

### History / Philosophy, Community 2

|                                        |                                        |                                        |
|----------------------------------------|----------------------------------------|----------------------------------------|
| Australasian Journal of Philosophy     | Biological Theory                      | Bulletin of Symbolic Logic             |
| European Journal of Philosophy         | Journal of Aesthetics and Art Criti... | Journal of Symbolic Logic              |
| Nous                                   | Philosophers' Imprint                  | Philosophical Quarterly                |
| Philosophical Review                   | Philosophical Studies                  | Philosophical Topics                   |
| Philosophy and Phenomenological Res... | Proceedings of the Aristotelian Soc... | Southern Journal of Philosophy         |
| The Cambridge Companion to the Phil... |                                        | Theoria : Revista de Teoria, Histor... |

### History / Philosophy, Community 3

|                                        |                               |                                        |
|----------------------------------------|-------------------------------|----------------------------------------|
| Contemporary Readings in Law and So... | Economics and Philosophy      | Ethics                                 |
| Harvard Divinity Bulletin              | Journal of Philosophy         | Pacific Philosophical Quarterly        |
| Philosophical Perspectives             | Philosophy and Public Affairs | Proceedings and Addresses of the Am... |
| Ratio                                  | Social Philosophy and Policy  | The Constitution of Agency             |
| The Monist                             | The Quality of Life           | The Tanner Lectures on Human Values    |
| Women, Culture, and Development: A ... |                               |                                        |

| History / Philosophy, Community 4 |                               |                     |
|-----------------------------------|-------------------------------|---------------------|
| American Literary History         | American Literary Scholarship | American literature |
| Critical Inquiry                  |                               | Prospects           |

| Linguistics, Community 1               |                                        |                                        |
|----------------------------------------|----------------------------------------|----------------------------------------|
| riu                                    | Acta Poetica                           | Amsterdam Studies in the Theory and... |
| Annual of Armenian Linguistics         | Baltistica                             | Brain Research                         |
| Die Sprache                            | Euskalingua                            | Harvard Ukrainian Studies              |
| Harvard Working Papers in Linguisti... | Heritage Language Journal              | Historische Sprachforschung            |
| Indo-European Studies                  | Innsbrucker Beitrge zur Spr...         | Journal of Cuneiform Studies           |
| Journal of Indo-European Studies       | Journal of the American Oriental So... | Journal of the Cork Historical and ... |
| Language                               | Language and Linguistics Compass       | Language Research                      |
| Lingua                                 | Linguistic Variation Yearbook          | Mnchener Studien zur Sprach...         |
| MIT Working Papers in Linguistics      | Natural Language and Linguistic The... | Oceanic Linguistics                    |
| Proceedings of the North East Lingu... | Syntax                                 | The Crane Bag                          |
| Tocharian and Indo-European Studies    |                                        | Transactions of the Philological So... |

| Linguistics, Community 2 |                                   |                                |
|--------------------------|-----------------------------------|--------------------------------|
| Brain and Language       | Journal of East Asian Linguistics | Journal of Memory and Language |
| Linguistic Inquiry       |                                   | Synthese                       |

| Miscellaneous, Community 1 |                                        |                                    |
|----------------------------|----------------------------------------|------------------------------------|
| Book History               | Contributions to the History of Con... | European Review                    |
| French Historical Studies  | Journal of Modern History              | Modern Intellectual History        |
| Pmla                       | Princeton University Library Chroni... | Proceedings of the British Academy |
|                            | Representations                        |                                    |

| Miscellaneous, Community 2             |                                        |                                        |
|----------------------------------------|----------------------------------------|----------------------------------------|
| American Journal of Public Health      | Annals of Internal Medicine            | Daedalus                               |
| International Anesthesiology Clinic... | Journal of Social Work and Human Se... | Journal of the American Medical Ass... |
| Journal of the American Medical Wom... | Milbank Quarterly                      | The Hastings Center Report             |

| Miscellaneous, Community 3 |                                        |                     |
|----------------------------|----------------------------------------|---------------------|
| American Music             | Black Music Research Journal           | Early Music History |
| Journal of Musicology      | Journal of the Society for American... | Musical Quarterly   |
|                            | Tempo                                  |                     |

| Law, Community 1          |                                  |                                        |
|---------------------------|----------------------------------|----------------------------------------|
| Emory Law Journal         | Georgetown Law Journal           | Harvard Civil Rights-Civil Libertie... |
| Journal of Legal Analysis | Loyola of Los Angeles Law Review | Maryland Law Review                    |
| Michigan Law Review       | New York University Law Review   | Roger Williams University Law Revie... |
|                           | Southern California Law Review   |                                        |

|                                   |                                |                             |
|-----------------------------------|--------------------------------|-----------------------------|
| Law, Community 2                  |                                |                             |
| Arizona Law Review                | Global Policy                  | Harvard BlackLetter Journal |
| Harvard International Law Journal | Harvard Journal on Legislation | Harvard Law Review          |
| Harvard Women's Law Journal       | Lewis and Clark Law Review     | Minnesota Law Review        |

|                                   |                                |                             |
|-----------------------------------|--------------------------------|-----------------------------|
| Arizona Law Review                | Global Policy                  | Harvard BlackLetter Journal |
| Harvard International Law Journal | Harvard Journal on Legislation | Harvard Law Review          |
| Harvard Women's Law Journal       | Lewis and Clark Law Review     | Minnesota Law Review        |
